# Supplementary figures and images for: Die wirtschaftliche Bedeutung von Individuellen Gesundheitsleistungen (IGeL) in der Augenheilkunde über die Zeit: Umfrageergebnisse aus 2010 und 2020
Source: Springer Nature journal article supplement (doi:10.1007/s00347-022-01743-y), 2022-11-04

A

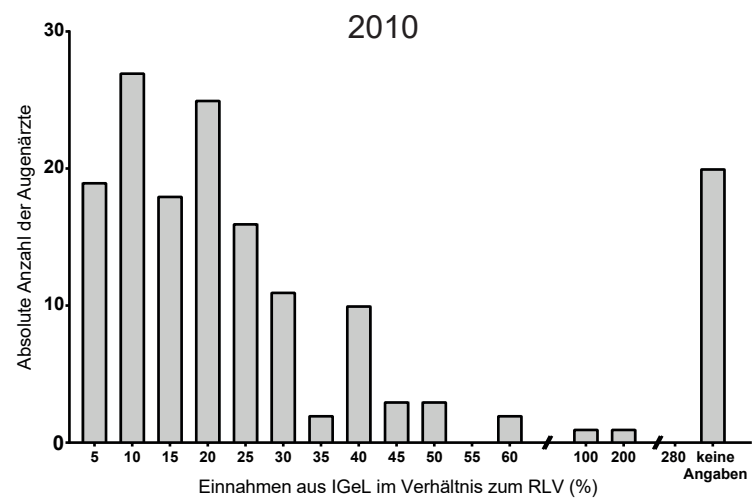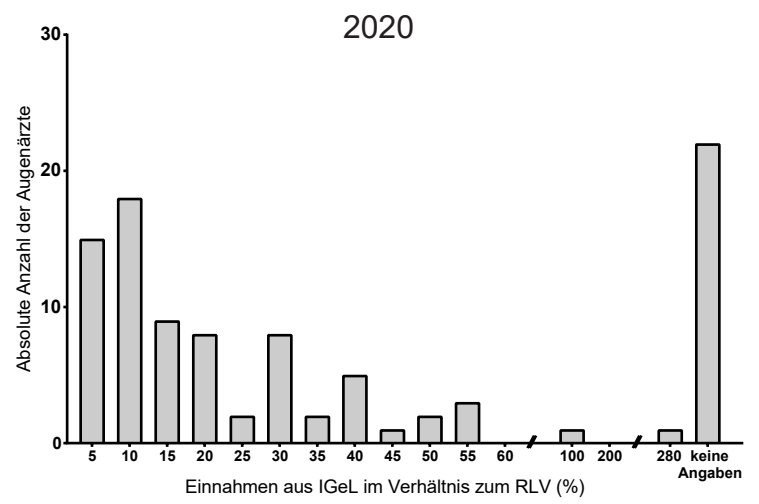

Abb. S1

Supplement: MOESM1 [file 23675416]

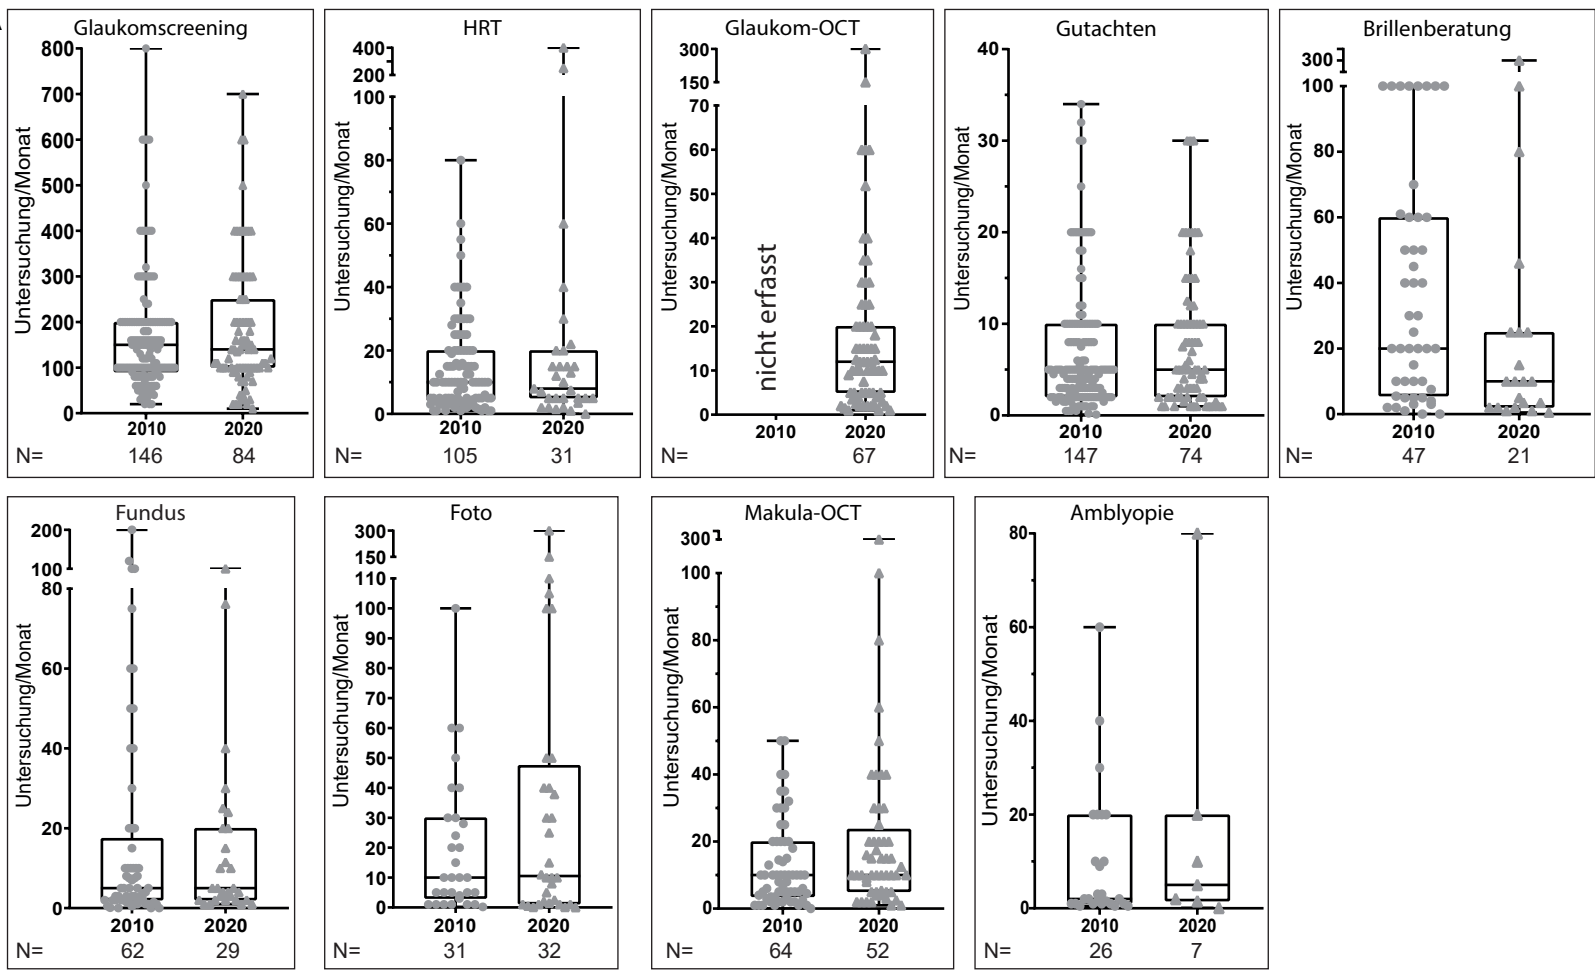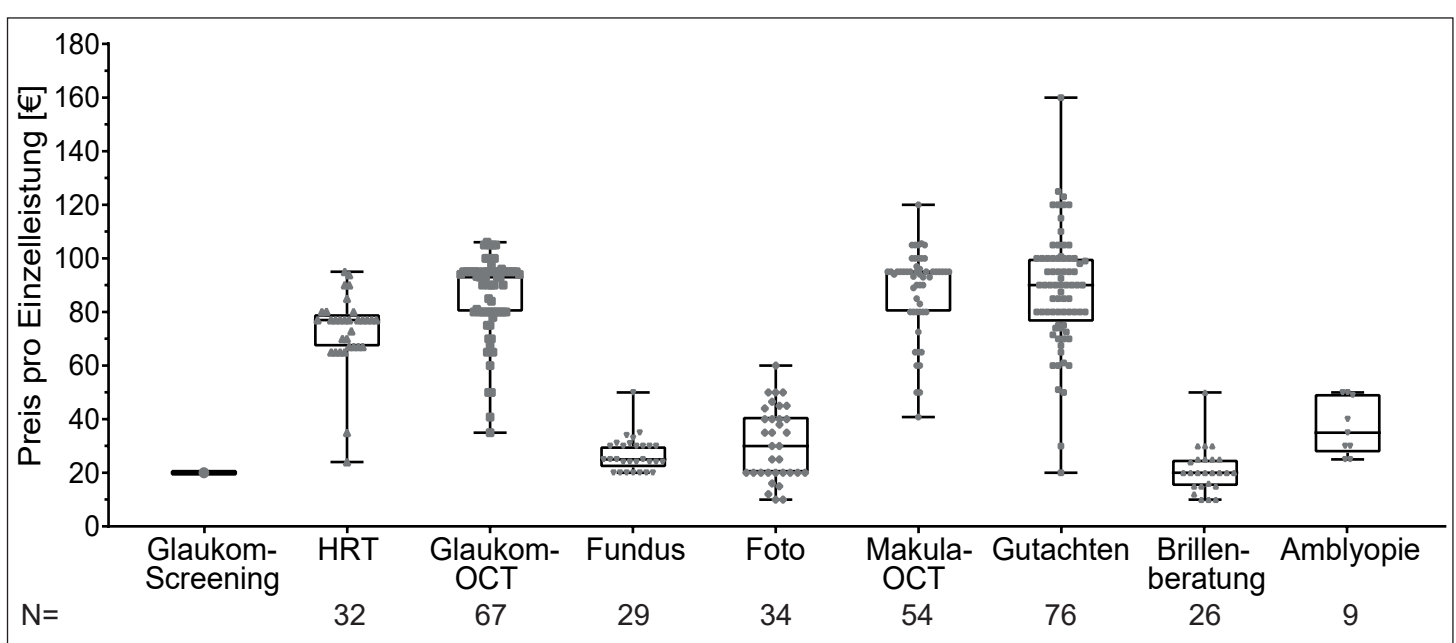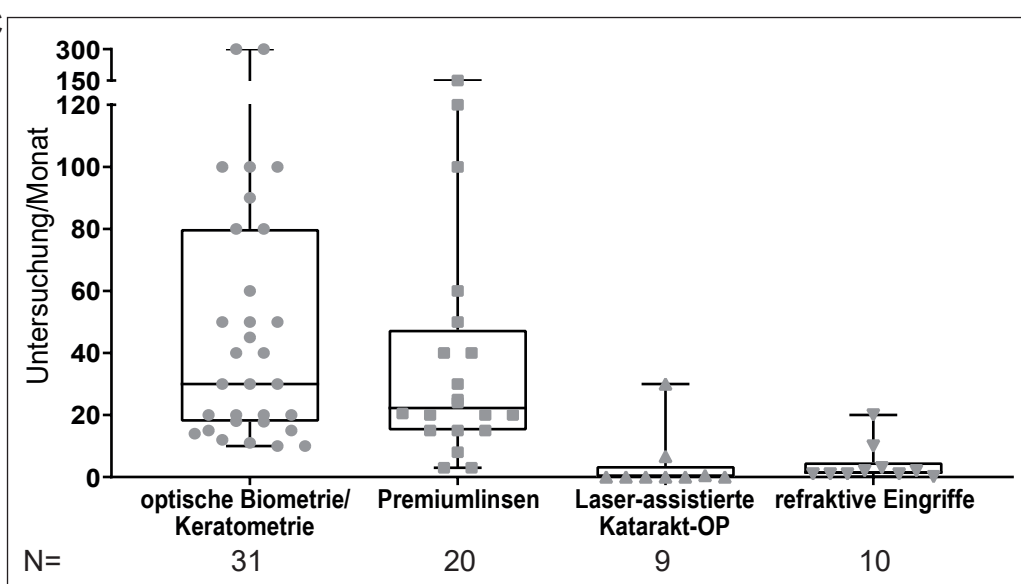

Abb. S2

Supplement: MOESM2 [file 23675416]

A

2010

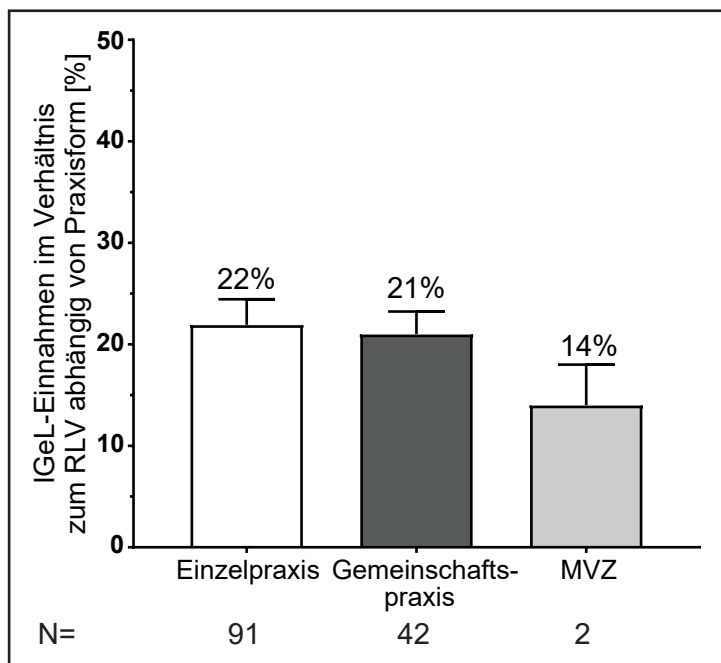

2020

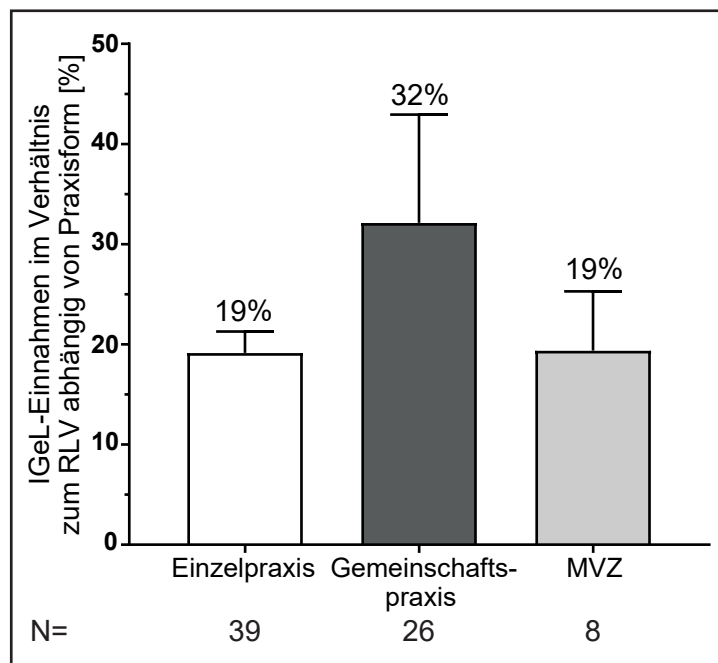

B

2010

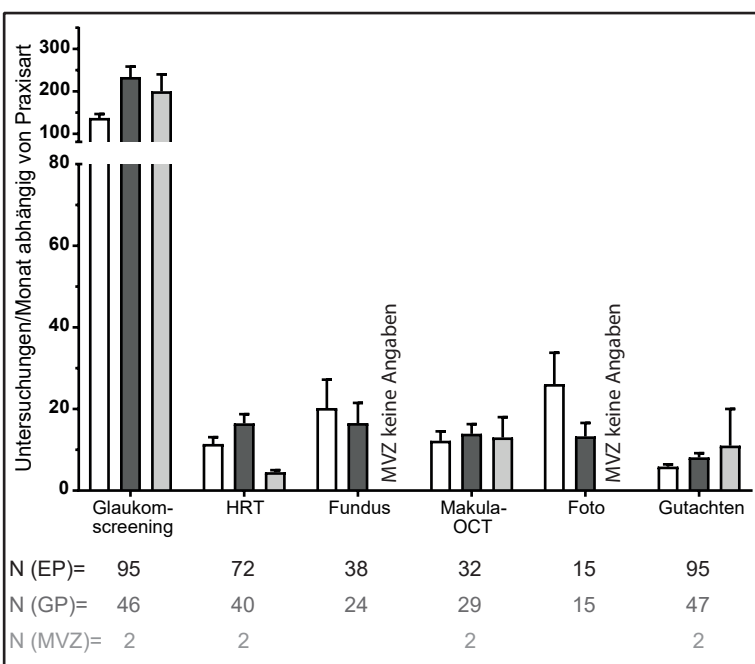

2020

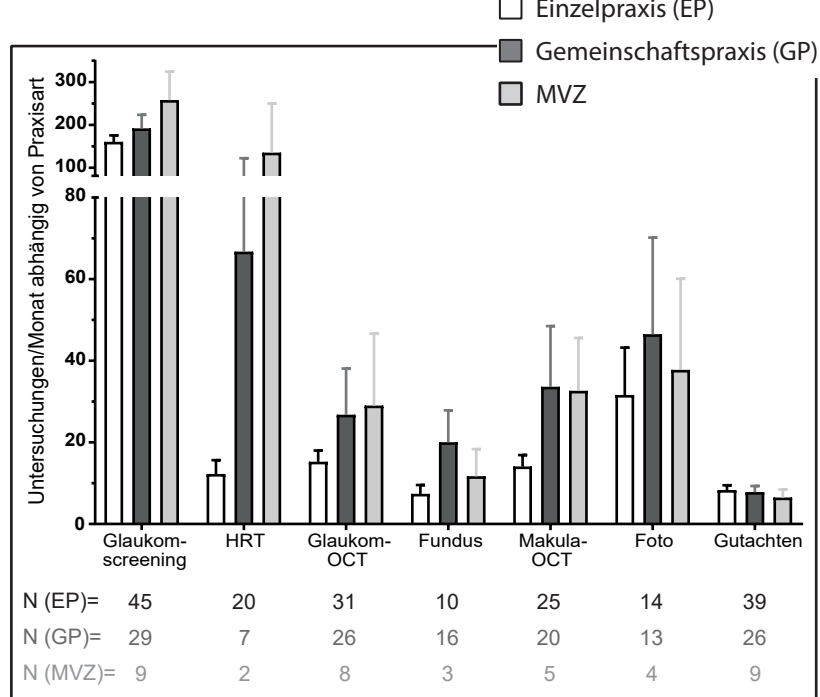

Abb. S3

Supplement: MOESM3 [file 23675416]
